# Supplementary material for: Alleviating Asthma-Induced Mitochondrial Dysfunction and Oxidative Stress: Lactobacillus rhamnosus Intervention via Notch1 Signaling Pathway
Source: Research Square preprint supplement (doi:10.21203/rs.3.rs-4188427/v1), 2024-04-12
Supplement: Supplementary file 1 [file ae711fd9a3b46ae1eb590e80.docx]

***Lactobacillus rhamnosus attenuates* *asthma-induced mitochondrial dysfunction and oxidative stress via the Notch1 signaling pathway***

Reagent and Antibody

**Table 1**

| **Reagent** | **Company** |
| --- | --- |
| Chicken serum egg protein | Sigma |
| acetylcholine | Sigma |
| LGG | American Standard Bacteria(ATCC) |
| MRS | Beijing Solarbio Science & Technology Co., Ltd. |
| Turbidimetric tube | Beijing Solarbio Science & Technology Co., Ltd. |
| BCA Protein quantitation kits | Beyotime Biotech Inc |
| IgE ELISA Kits | Shang Hai Ze Ye Biotechnology Co., Ltd. |
| IL-4 ELISA Kits | LMAI Bio |
| IL-17A ELISA Kits | LMAI Bio |
| HE Staining kits | Beyotime Biotech Inc |
| IgG(H+L) | Beyotime Biotech Inc |
| CD3 antibody | BD Biosciences |
| CD4 antibody | BD Biosciences |
| TNF-α antibody | BD Biosciences |
| IL-4 antibody | BD Biosciences |
| IL-17 antibody | BD Biosciences |
| Foxp3 antibody | BD Biosciences |
| IFN-γ ELISA Kits | Beyotime Biotech Inc |
| HMGB1 ELISA Kits | LMAI Bio |
| IL-1β ELISA Kits | LMAI Bio |
| IL-18 ELISA Kits | LMAI Bio |
| Anti-GSDMD N | LMAI Bio |
| Anti-GSDMD G | Abcam |
| Anti- NLRP3 | Abcam |
| Anti- pro-caspase1 | Abcam |
| Anti- pro-IL-1β | Abcam |
| Anti- ASC | Abcam |
| xylene | Beyotime Biotech Inc |
| Absolute ethanol | Chengdu Cologne Chemical Co., Ltd |

**Table 2**

| **Reagent** | **Company** |
| --- | --- |
| Low-speed centrifuge | Thermo Fisher Scientific |
| Small animal pulmonary function meter | American BUXCO Corporation |
| Ultrasonic atomizer 402B | Jiangsu Yuyue Medical Equipment Co., Ltd |
| Fluorescence microscopy | OLYMPUS |
| Microplate reader | Biorad |
| Electrophoresis tank | Beijing Cavoy Instrument Co., Ltd |
| oscillator | Haimen Kylin-Bell Lab Instruments Co.,Ltd |
| Constant Hot Water Bath Box | Zhicheng Inc |
| Micropipette | Thermo Fisher Scientific |
| Ice machine | Thermo Fisher Scientific |
| Vertical pressure steam sterilizer | Tomy Digital Biology |
| Ultramicrotome | Leica |
